# Supplementary material
Source: ML conference proceedings conference paper supplement (https://proceedings.mlr.press/v164/xu22a.html)

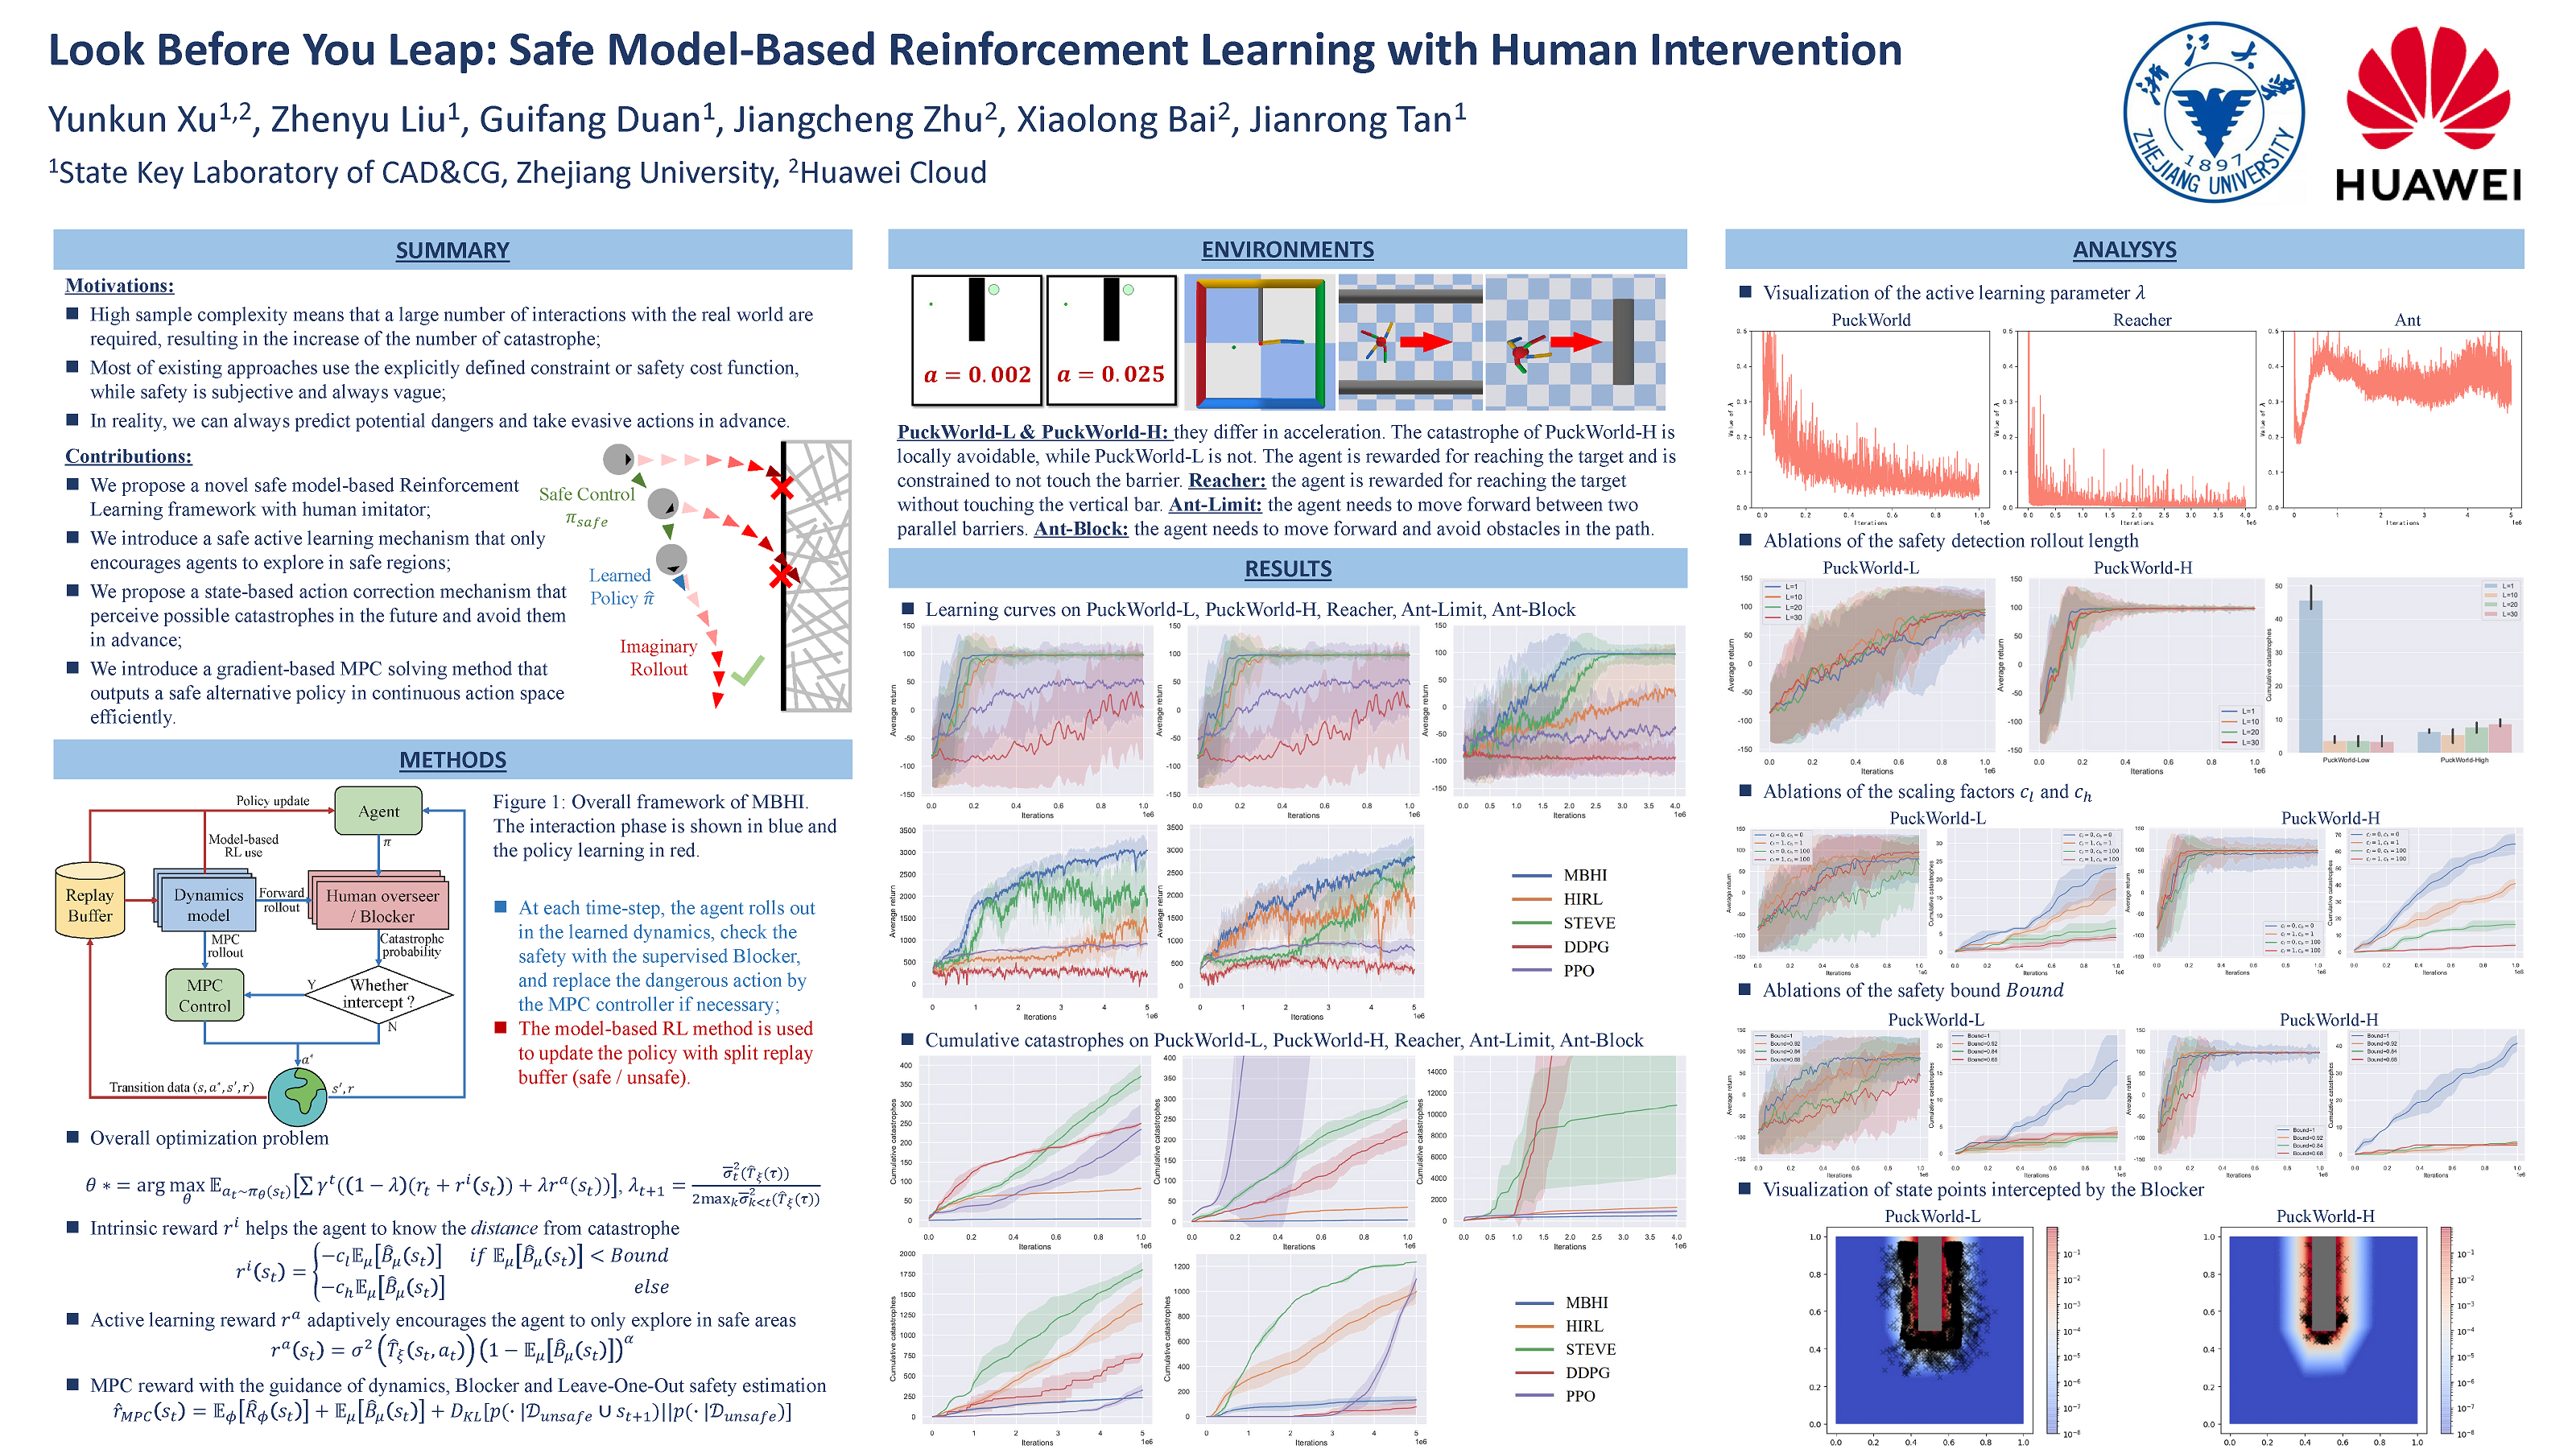

Supplement: Supplementary file 2 [file xu22a-supp.zip › Poster.png]
